# Supplementary material for: AICAR, an AMP-Activated Protein Kinase Activator, Ameliorates Acute Pancreatitis-Associated Liver Injury Partially Through Nrf2-Mediated Antioxidant Effects and Inhibition of NLRP3 Inflammasome Activation
Source: PubMed Central journal article supplement (PMC8438129; doi:10.3389/fphar.2021.724514), 2021-08-31
Supplement: Table1.pdf [file Table1.pdf]

---

| Gene          | Forward primer (5'–3')   | Reverse primer (5'–3')  |
|---------------|--------------------------|-------------------------|
| GAPDH         | ACCACAGTCCATGCCATCAC     | TCCACCACCCTGTTGCTGTA    |
| IL-6          | GAGTTGTGCAATGGCAATTC     | ACTCCAGAAGACCAGAGCAG    |
| IL-1 $\beta$  | AGGCTGACAGACCCCAAAAG     | CTCCACGGGCAAGACATAGG    |
| TNF- $\alpha$ | AAATGGGCTCCCTCTCATCAGTTC | TCTGCTTGGTGGTTTGCTACGAC |

---
